# Supplementary material for: Repulsive double many-body expansion potential energy surface for the reactions N(4S)+ H2⇌ NH(X3Σ–)+ H from accurate ab initio calculations
Source: Royal Society of Chemistry journal article supplement (doi:10.1039/b505590c), 2005-01-01

Repulsive double many-body expansion potential energy surface for the reactions  $\text{N}(^4S) + \text{H}_2 \rightleftharpoons \text{NH}(X^3\Sigma^-) + \text{H}$  from accurate *ab initio* calculations

L.A. Poveda and A.J.C. Varandas<sup>†</sup>  
 Departamento de Química, Universidade de Coimbra  
 3004-535 Coimbra, Portugal  
 (Received April , 2005)

## 1 ESI

Table 1: Numerical values of linear parameters in three-body EHF energy [Eq. (11)]

| Monomial <sup>(a)</sup> | $P^{(1)}$   | $P^{(2)}$   | $P^{(3)}$    | $P^{(4)}$   | $P^{(5)} + P^{(6)}$ |
|-------------------------|-------------|-------------|--------------|-------------|---------------------|
| 1                       | -1.05178744 | -1.28631580 | 37.18142283  | -0.36996706 | -0.00028873         |
| $Q_1$                   | 0.24297418  | 0.03529024  | -9.52870187  | 0.59566597  | -0.00052680         |
| $Q_3$                   | 0.09997771  | -4.00515202 | 10.77084293  | -0.73171800 | 0.00073558          |
| $Q_1^2$                 | -0.34468440 | -0.41988830 | 8.19635500   | -0.26319608 | -0.00119021         |
| $S_{2a}^2$              | -0.21282735 | 0.11821915  | 4.39845323   | -0.55472055 | -0.00150357         |
| $Q_1Q_3$                | -0.02247595 | 0.24427013  | -11.36109339 | 0.71732588  | 0.00261679          |
| $S_{2b}^2$              | 0.01482181  | -0.72030626 | -1.67107981  | 0.17332326  | 0.00197284          |
| $Q_1^3$                 | 0.07220708  | -0.04850940 | -2.23938524  | 0.69383297  |                     |
| $Q_1S_{2a}^2$           | 0.05292190  | 1.55023506  | -4.97684545  | 1.46306626  |                     |
| $S_3^3$                 | -0.02642770 | 0.53428223  | 1.23385500   | 0.12909653  |                     |
| $Q_1^2Q_3$              | -0.00247296 | -1.90412100 | 6.13705769   | -1.69759656 |                     |
| $Q_1S_{2b}^2$           | 0.01671696  | -1.18615220 | 3.93340670   | -0.19983955 |                     |
| $Q_3S_{2a}^2$           | 0.04116850  | -1.48771633 | 3.67760509   | -0.93810278 |                     |
| $Q_1^4$                 | -0.03838601 | 0.00571499  | 0.49395874   | -0.00640085 |                     |
| $Q_1^2S_{2a}^2$         | -0.02354100 | 0.73768833  | 1.03845518   | 0.42536278  |                     |
| $S_{2a}^4$              | -0.01776613 | 0.24998135  | 0.86110270   | -0.07269609 |                     |
| $Q_1S_3^3$              | 0.00347241  | 0.11559547  | -1.63392487  | 0.36422847  |                     |
| $Q_1^3Q_3$              | -0.01454571 | -0.24422230 | -1.14450028  | 0.14580878  |                     |
| $Q_1^2S_{2b}^2$         | 0.02517522  | -0.10991995 | -1.84885114  | 0.82279545  |                     |
| $Q_1Q_3S_{2a}^2$        | -0.01541134 | -0.98518996 | -2.89770159  | 0.09241726  |                     |
| $Q_3S_3^3$              | 0.00309870  | -0.18348663 | 0.84393923   | 0.03998637  |                     |
| $S_{2a}^2S_{2b}^2$      | -0.00863339 | -0.18787207 | 0.05322814   | 0.30692547  |                     |
| $Q_1^5$                 | 0.00467027  | -0.01479406 | 0.01363897   | 0.19427432  |                     |
| $Q_1^3S_{2a}^2$         | 0.00305180  | 0.38670452  | 0.17650072   | 0.70168290  |                     |
| $Q_1S_{2a}^4$           | 0.00563664  | 0.08641209  | -0.52995149  | 0.40349765  |                     |
| $Q_1^2S_3^3$            | -0.00635590 | -0.31232982 | 0.38257825   | -0.47029746 |                     |

<sup>†</sup>E-mail: varandas@qtvsl1.qui.uc.pt

Table 1: Continue

|                           |             |             |             |             |
|---------------------------|-------------|-------------|-------------|-------------|
| $S_{2a}^2 S_3^3$          | 0.00093067  | 0.03717180  | 0.06406620  | 0.16517591  |
| $Q_1^4 Q_3$               | -0.00191289 | -0.20524932 | -0.14914096 | -0.82459620 |
| $Q_1^3 S_{2b}^2$          | -0.00028851 | -0.26653852 | 0.13247676  | -0.69926553 |
| $Q_1^2 Q_3 S_{2a}^2$      | -0.00055169 | -0.36831991 | 0.45992621  | -0.62439125 |
| $Q_1 Q_3 S_3^3$           | -0.00855949 | 0.42015452  | -0.46087700 | 0.54237803  |
| $Q_1 S_{2a}^2 S_{2b}^2$   | -0.00142487 | 0.19015713  | 0.31461667  | 0.56930997  |
| $Q_3 S_{2b}^4$            | -0.00014422 | 0.02758644  | 0.28767150  | -0.08102447 |
| $S_{2b}^2 S_3^3$          | -0.00458444 | 0.12336714  | -0.06927595 | 0.17307234  |
| $Q_1^6$                   | -0.00060270 | 0.00526833  | 0.01483105  | 0.00295053  |
| $Q_1^4 S_{2a}^2$          | 0.00102479  | 0.07492846  | -0.06260909 | 0.02187464  |
| $Q_1^2 S_{2a}^4$          | 0.00087590  | 0.06539543  | 0.08008578  | 0.00914510  |
| $Q_1^3 S_3^3$             | 0.00016780  | -0.12824595 | -0.07001586 | 0.11881671  |
| $Q_1 S_{2a}^2 S_3^3$      | 0.00088514  | -0.05562035 | -0.02230554 | 0.11426900  |
| $S_{2a}^6$                | -0.00124979 | -0.00965497 | 0.02972053  | 0.04872057  |
| $S_3^6$                   | 0.00056795  | 0.01339990  | 0.00410558  | -0.02759933 |
| $Q_1^5 Q_3$               | -0.00055137 | -0.05727853 | -0.01465181 | -0.01776944 |
| $Q_1^4 S_{2b}^2$          | 0.00124398  | -0.12068992 | -0.04002109 | 0.08408040  |
| $Q_1^3 Q_3 S_{2a}^2$      | 0.00183727  | -0.18574568 | 0.04578215  | 0.12831533  |
| $Q_1^2 Q_3 S_3^3$         | 0.00519425  | 0.20430378  | 0.12184588  | -0.17614952 |
| $Q_1^2 S_{2a}^2 S_{2b}^2$ | 0.00466357  | 0.02339944  | 0.01431361  | 0.10604234  |
| $Q_1 Q_3 S_{2a}^4$        | -0.00253519 | 0.03520933  | -0.13895356 | -0.05121423 |
| $Q_1 S_{2b}^2 S_3^3$      | -0.00108523 | 0.07406005  | 0.02868872  | -0.05760229 |
| $Q_3 S_{2a}^2 S_3^3$      | 0.00044764  | 0.01897105  | -0.02283982 | 0.03013954  |
| $S_{2a}^4 S_{2b}^2$       | -0.00059907 | 0.00683649  | -0.06159597 | 0.07370483  |

<sup>a)</sup>The variables are defined as follows:  $S_{2a}^2 = Q_2^2 + Q_3^2$ ,  $S_{2b}^2 = Q_2^2 - Q_3^2$ ,  $S_3^3 = Q_3^3 - 3Q_2^2 Q_3$ .

Table 2: Range-determining parameters and reference geometries in Eq. (11)

| Polynomial | $\gamma_1^{(j)}$ | $\gamma_2^{(j)}$ | $\gamma_3^{(j)}$ | $R_1^{(j),ref}$ | $R_2^{(j),ref}$ | $R_3^{(j),ref}$ |
|------------|------------------|------------------|------------------|-----------------|-----------------|-----------------|
| $P^{(1)}$  | 0.6              | 0.7              | 0.7              | 1.5             | 4.0             | 4.0             |
| $P^{(2)}$  | 0.35             | 1.35             | 1.35             | 2.5             | 3.0             | 3.0             |
| $P^{(3)}$  | 0.45             | 0.8              | 0.8              | 3.5             | 2.0             | 2.0             |
| $P^{(4)}$  | 0.75             | 2.1              | 2.1              | 5.0             | 2.5             | 2.5             |
| $P^{(5)}$  | 0.81             | 1.87             | 1.03             | 4.8             | 1.965           | 6.765           |
| $P^{(6)}$  | 0.81             | 1.03             | 1.87             | 4.8             | 6.765           | 1.965           |

Figure 1: Contour plot for symmetric stretching of collinear H – N – H. Contours are equally spaced by  $0.01 E_h$ , starting at  $-0.1303 E_h$ .

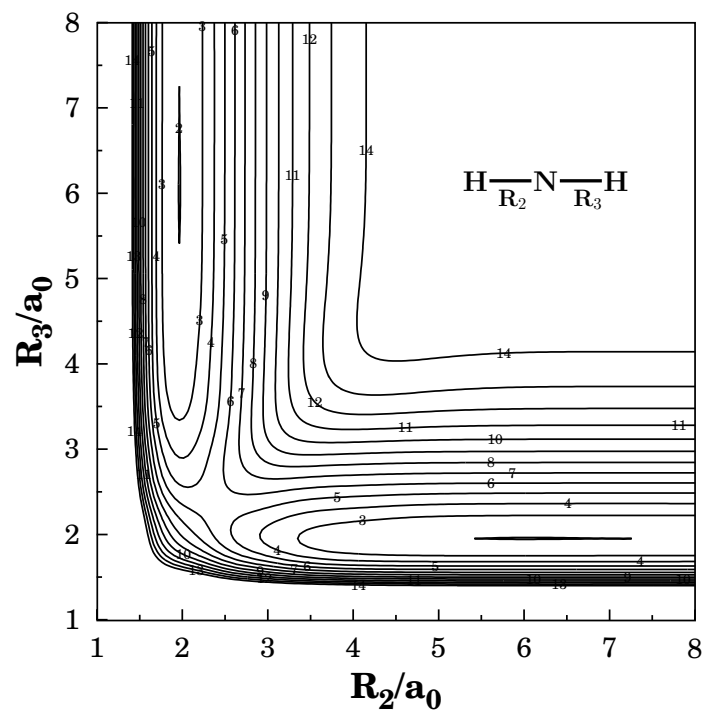

Supplement: b505590c.pdf [file b505590c.pdf]
